# Supplementary material for: Furin Regulates the Alveolarization of Neonatal Lungs in a Mouse Model of Hyperoxic Lung Injury
Source: MDPI journal article supplement (doi:10.3390/biom13111656), 2023-11-16
Supplement: s1 [file s1]

Supplementary figure S1

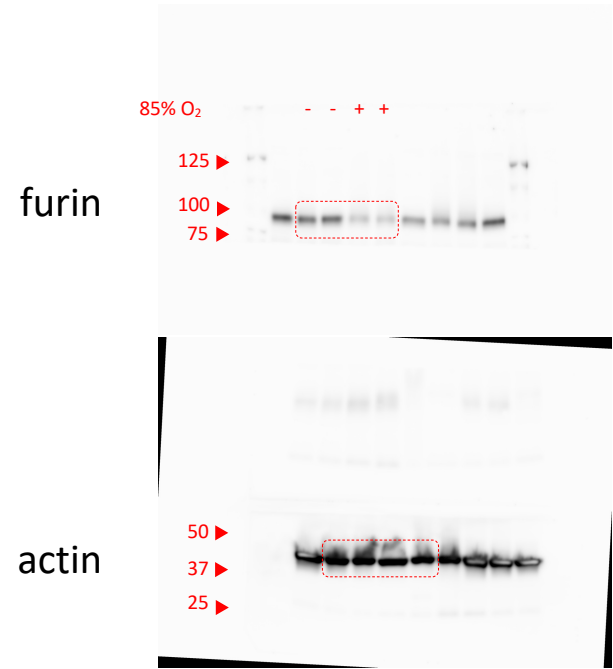

Original blots of Figure 2(e)

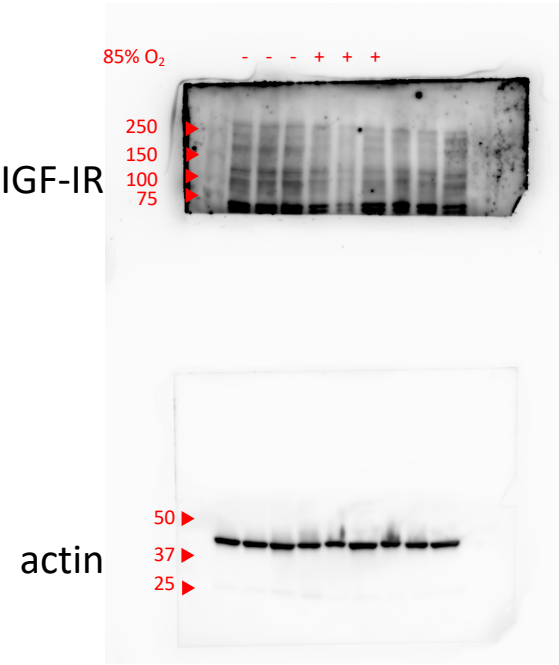

Original blots of Figure 3(a)

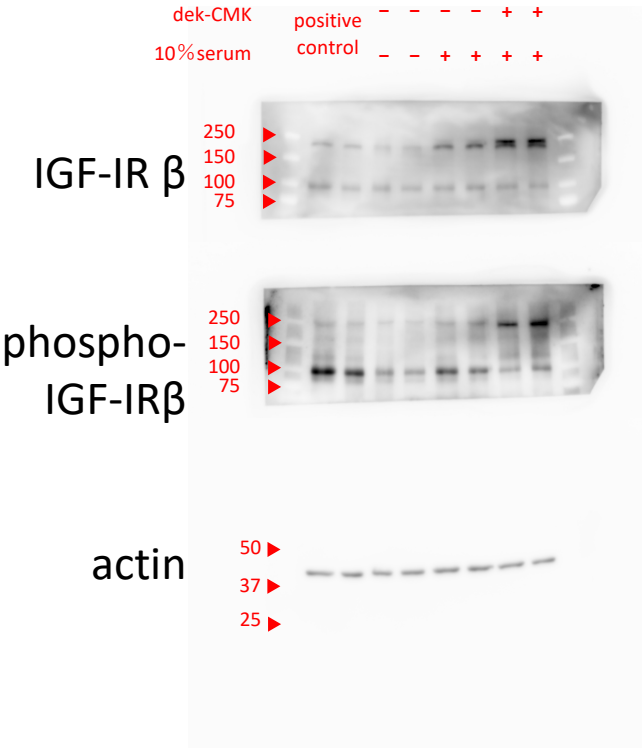

Original blots of Figure 5

## Supplementary Figure S2

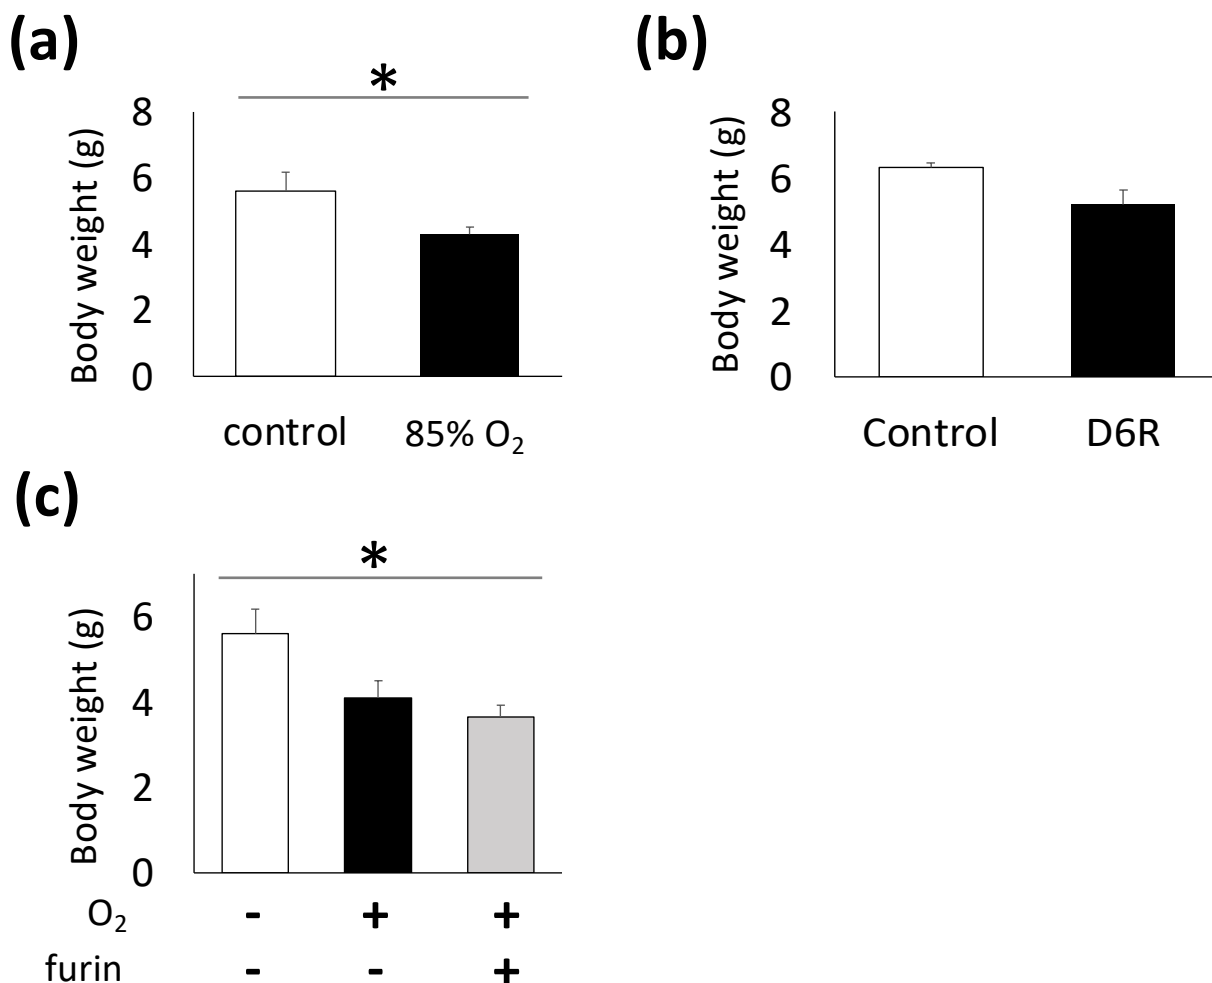

**Figure S2.** Mouse pups exposed to 85% O<sub>2</sub> for 10 days exhibited a significant decrease in body weight compared to the control mouse pups (a), (control, n=5; hyperoxia, n = 5; \*p < 0.05). However, administration of Hexa-D Arginine showed lower body weight at P10, but failed to reach a significance (b), (control, n=5; D6R, n = 5) . Similarly, administration of recombinant furin to mice exposed to 85% O<sub>2</sub> did not show changes in body weight compared to the mice exposed to 85% O<sub>2</sub> treated with PBS (c), (control, n=5; hyperoxia, n = 5; hyperoxia + furin, n=5) .
